# Supplementary figures and images for: SLC16A3 Drives Lung Adenocarcinoma Progression and Gefitinib Resistance through Coordinated Regulation of Ferroptosis and Lactate Metabolism
Source: Research Square preprint supplement (doi:10.21203/rs.3.rs-6833528/v1), 2025-06-16

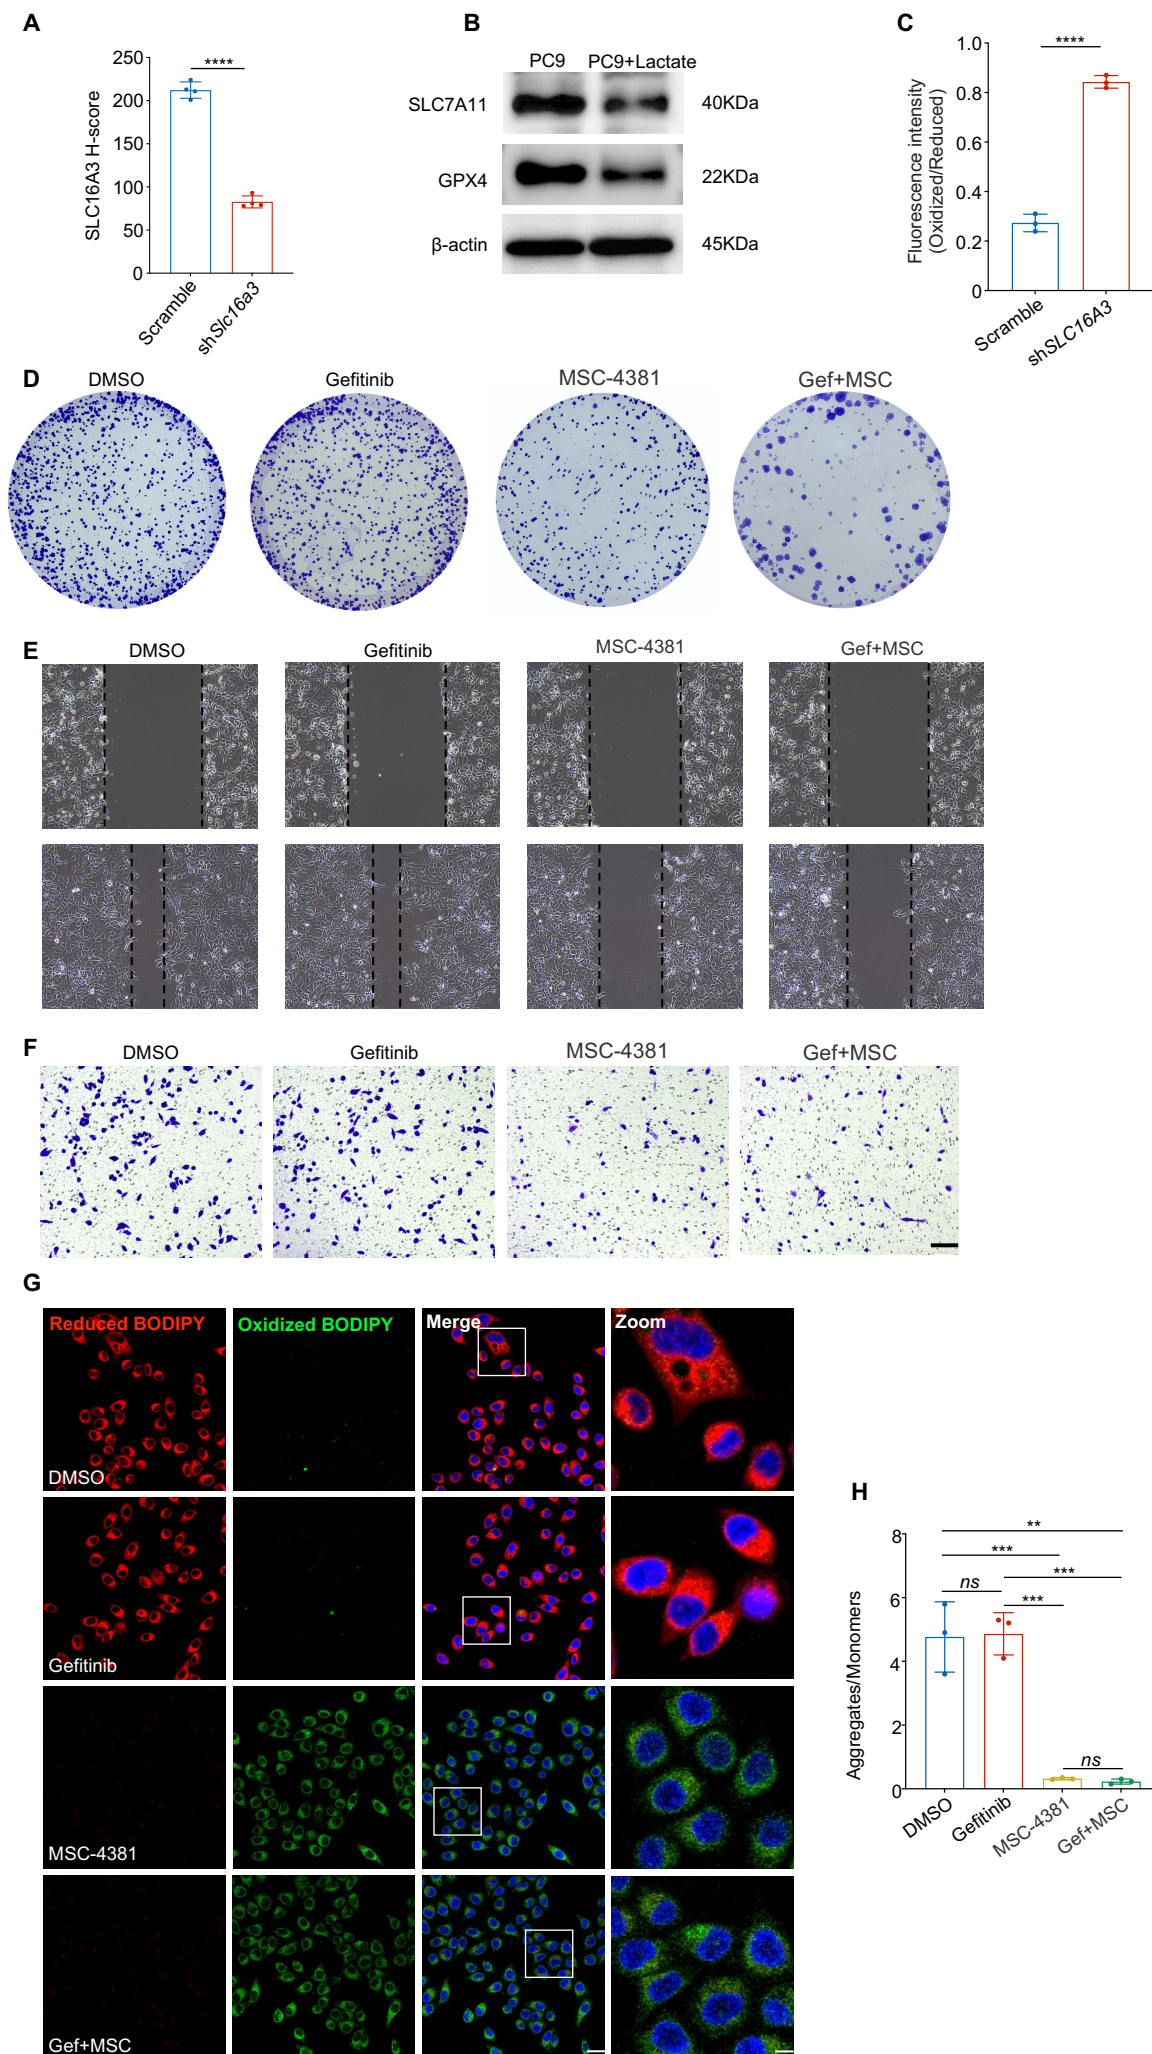

Supplement: Supplementary file 1 [file Supplementary Figure.pdf › Supplementary Figure.pdf]
